# Supplementary material
Source: Springer Nature journal article supplement (https://www.springermedizin.de/resource/supplementary/12891_2013_2030_MOESM1_ESM.pdf/9510134)
Supplement: MOESM1 [file 9510134]

## Online resource 1: Search strategy

### Search strategy

#11 AND #12; where #12=#4 OR #5 OR #6 OR #7 OR #8 OR #9 OR #10, and #11=#1 OR #2 OR #3; where #1='low back pain', #2='backache', #3='lumbago', #4='grounded theory', #5='interview?', #6='focus group?', #7='phenomonolog\*', #8='action research', #9='ethnographic', #10='epistemology'; and where ? is a wildcard, and \* permits any suffix permutation
